# Supplementary material for: An Insight into Goat Cheese: The Tales of Artisanal and Industrial Gidotyri Microbiota
Source: MDPI journal article supplement (doi:10.3390/microorganisms11010123), 2023-01-03
Supplement: s1 [file s1]

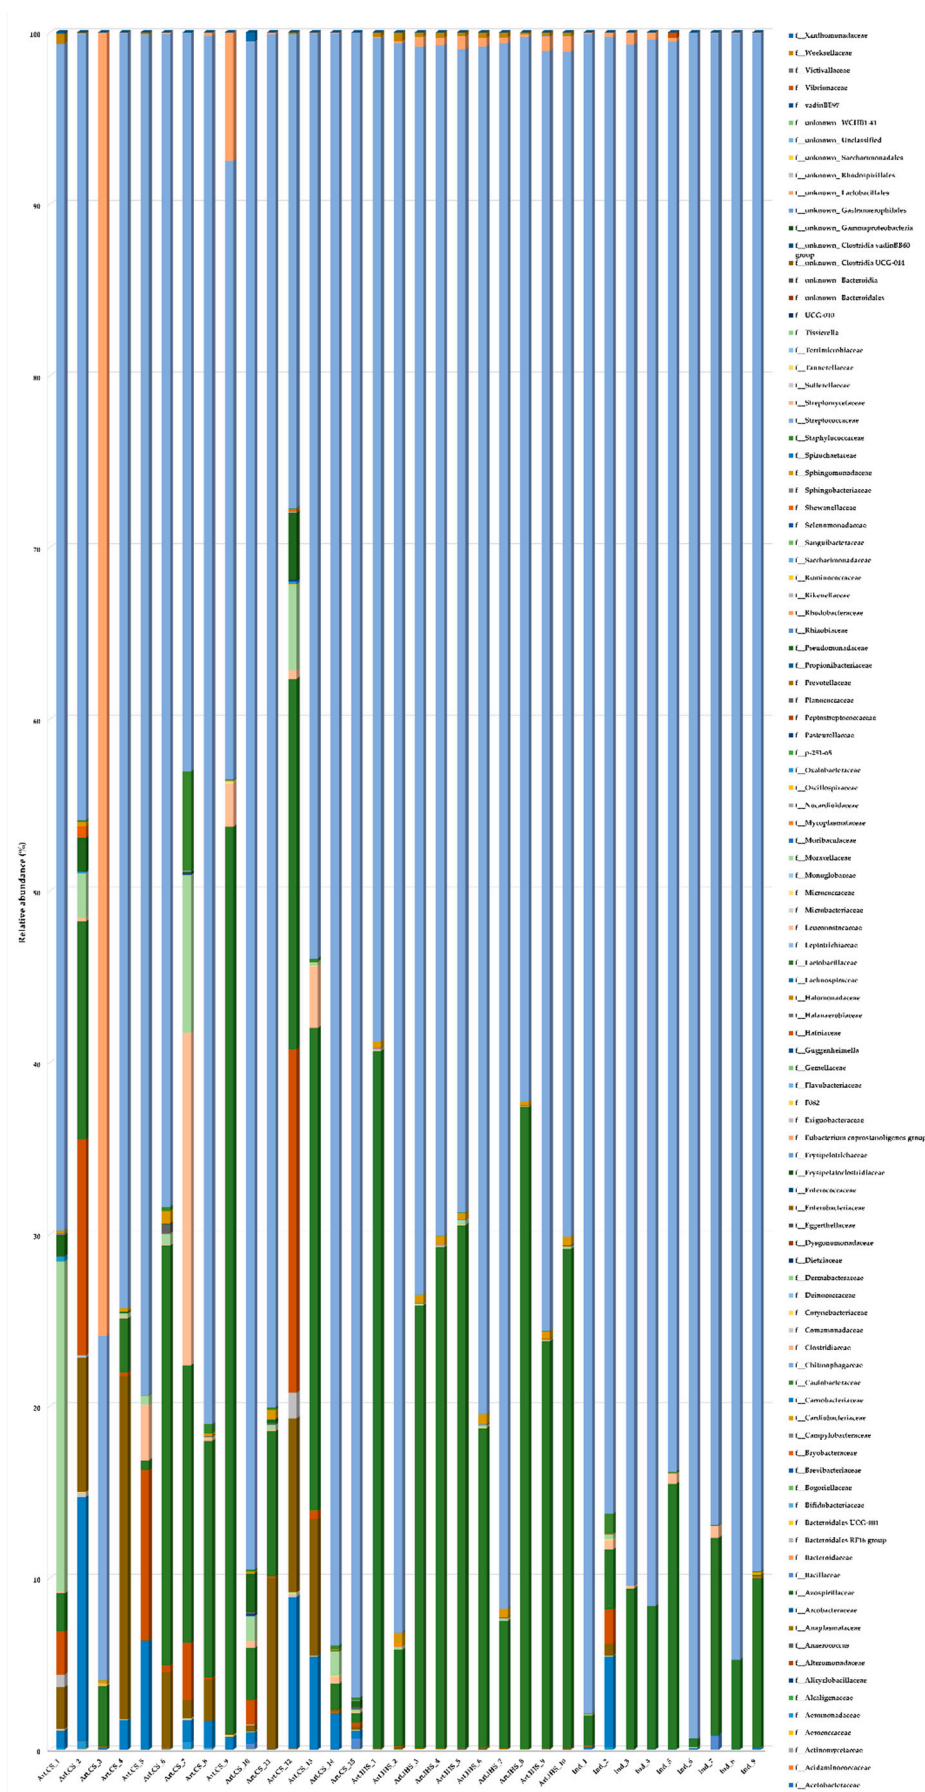

**Figure S1.** Stacked barplots of the relative abundance of the families identified in the Artisanal\_CS (Art. CS), Artisanal\_IHS (Art. IHS) and Industrial (Ind.) gdotyri cheeses.

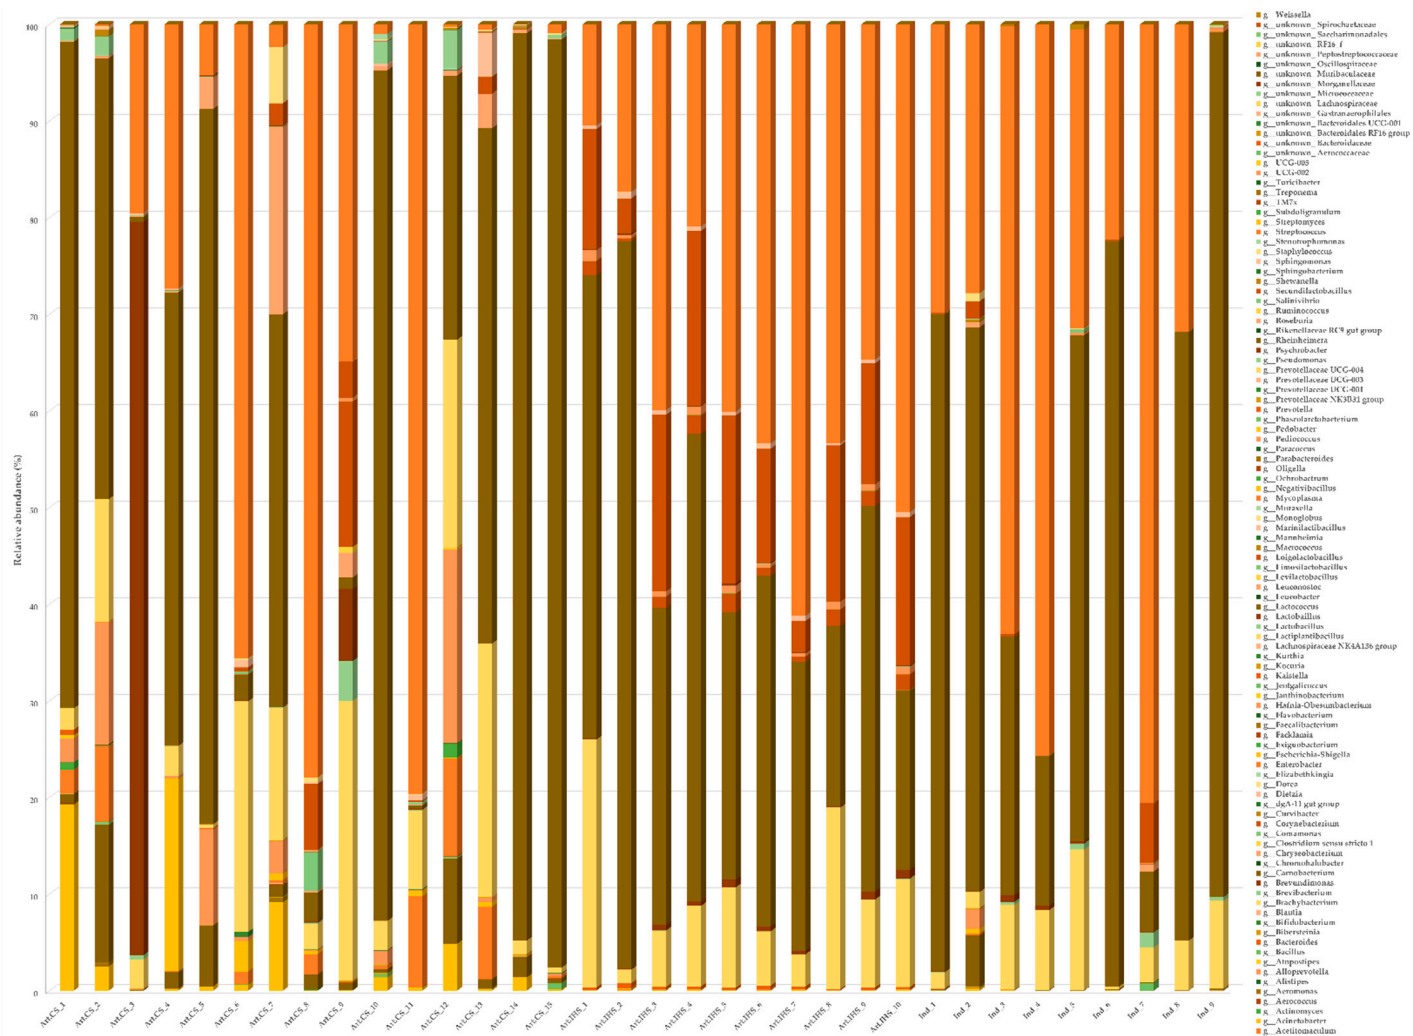

**Figure S2.** Stacked barplots of the relative abundance of the genera identified in the Artisanal\_CS (Art. CS), Artisanal\_IHS (Art. IHS) and Industrial (Ind.) gidosyri cheeses.
